# Supplementary material for: Patient-derived models of brain metastases recapitulate human disseminated disease
Source: PubMed Central journal article supplement — Cell Rep Med. 2022 May 3;3(5):100623. doi: 10.1016/j.xcrm.2022.100623 (PMC9133464; doi:10.1016/j.xcrm.2022.100623), 2022-05-03
Supplement: mmc1.pdf [file mmc1.pdf]

**Cell Reports Medicine, Volume 3**

**Supplemental information**

**Patient-derived models of brain metastases**

**recapitulate human disseminated disease**

**Claudia C. Faria, Rita Cascão, Carlos Custódia, Eunice Paisana, Tânia Carvalho, Pedro Pereira, Rafael Roque, José Pimentel, José Miguéns, Isidro Cortes-Ciriano, and João T. Barata**

## **SUPPLEMENTAL INFORMATION**

**Supplementary Table 1.** Summary of the clinical data of BMs patients and experimental results from PDX and PDC models.

| Patient |           |        |     |               |                  |                       |            |                            |                           | PDX models   |                     |            |                |              |                 |            |                | PDC    |
|---------|-----------|--------|-----|---------------|------------------|-----------------------|------------|----------------------------|---------------------------|--------------|---------------------|------------|----------------|--------------|-----------------|------------|----------------|--------|
| Pt. No. | Sample ID | Gender | Age | Primary tumor | Location (ST/IT) | Specific location     | No. of BMs | Previous Radiation (RT/RS) | Overall survival (months) | Subcutaneous |                     |            |                | Intracardiac |                 |            |                | Yes/No |
|         |           |        |     |               |                  |                       |            |                            |                           | Engrafted    | Latency time (days) | Metastases | CNS Metastases | Engrafted    | Survival (Days) | Metastases | CNS Metastases |        |
| 1       | MET-CF29  | F      | 70  | Bladder       | ST               | Skull                 | 1          | No                         | 7.4                       | Yes          | 31 (24-67)          | No         | No             | Yes          | 45 (42-67)      | Yes        | Yes (B)        | Yes    |
| 2       | MET-CF30  | M      | 72  | Lung          | IT               | Cerebellar hemisphere | 2          | No                         | 5.8                       | Yes          | 69 (58-76)          | No         | No             | Yes          | 144 (130-158)   | Yes        | No             | Yes    |
| 3       | MET-CF32  | M      | 80  | Bladder       | ST               | Temporal              | 2          | No                         | 16.7                      | Yes          | 70                  | No         | No             | NP           | -               | -          | -              | No     |
| 4       | MET-CF38  | M      | 49  | Lung          | IT               | Cerebellar hemisphere | 1          | No                         | 10.4                      | Yes          | 20 (18-29)          | Yes        | No             | NP           | -               | -          | -              | No     |
| 5       | MET-CF58  | M      | 65  | Lung          | ST               | Parietal              | 2          | No                         | 7.4                       | Yes          | 22 (18-47)          | Yes        | No             | NP           | -               | -          | -              | No     |
| 6       | MET-CF63  | F      | 44  | Breast        | ST               | Fronto-parietal       | 2          | No                         | 10.1                      | No           | -                   | -          | -              | -            | -               | -          | -              | No     |
| 7       | MET-CF65  | M      | 25  | Osteosarcoma  | ST               | Frontal               | 1          | No                         | 2.5                       | Yes          | 20 (22-30)          | No         | No             | Yes          | 64 (61-72)      | Yes        | No             | Yes    |
| 8       | MET-CF66  | F      | 66  | Lung          | ST               | Frontal               | 1          | No                         | 15                        | Yes          | 31 (24-35)          | Yes        | Yes (LM)       | Yes          | 175             | Yes        | No             | No     |
| 9       | MET-CF67  | M      | 54  | Lung          | IT               | Cerebellar hemisphere | 1          | RS                         | 20.3                      | No           | -                   | -          | -              | -            | -               | -          | -              | No     |
| 10      | MET-CF68  | M      | 59  | Lung          | ST               | Frontal               | 1          | No                         | 19.3                      | Yes          | 26 (24-35)          | Yes        | No             | Yes          | 65 (63-141)     | Yes        | No             | Yes    |
| 11      | MET-CF69  | M      | 76  | Melanoma      | ST               | Frontal               | 3          | No                         | 1.2                       | Yes          | 33 (38-46)          | Yes        | No             | Yes          | 70 (60-75)      | Yes        | Yes (B+LM)     | Yes    |
| 12      | MET-CF70  | F      | 80  | Colon         | IT               | Vermis                | 1          | No                         | 8.1                       | Yes          | 34 (28-39)          | Yes        | No             | Yes          | 83 (80-95)      | Yes        | Yes (B+LM)     | Yes    |
| 13      | MET-CF71  | F      | 41  | Nasosinusal   | ST               | Skull                 | 1          | No                         | 17.8                      | No           | -                   | -          | -              | -            | -               | -          | -              | No     |
| 14      | MET-CF73  | M      | 60  | Renal         | ST               | Occipital             | 1          | No                         | 16.9                      | No           | -                   | -          | -              | -            | -               | -          | -              | No     |
| 15      | MET-CF74  | M      | 59  | Renal         | ST               | Orbital               | 1          | No                         | 4.1                       | No           | -                   | -          | -              | -            | -               | -          | -              | No     |
| 16      | MET-CF75  | F      | 58  | Colon         | IT               | Cerebellar hemisphere | 1          | No                         | 2.4                       | Yes          | 46 (46-183)         | No         | No             | No           | -               | -          | -              | Yes    |
| 17      | MET-CF76  | F      | 62  | Lung          | ST               | Frontal               | 3          | RT                         | 16.8                      | No           | -                   | -          | -              | -            | -               | -          | -              | No     |
| 18      | MET-CF78  | M      | 61  | Lung          | IT               | Cerebellar hemisphere | 2          | No                         | 6.5                       | Yes          | 26 (21-37)          | Yes        | Yes (LM)       | Yes          | 77 (61-88)      | Yes        | No             | Yes    |
| 19      | MET-CF79  | F      | 64  | Lung          | ST               | Occipital             | 1          | RS                         | 10.3                      | Yes          | 62 (58-74)          | No         | No             | Yes          | 145 (11-289)    | Yes        | No             | No     |
| 20      | MET-CF80  | M      | 64  | Lung          | IT               | Vermis                | 1          | No                         | 3.5                       | Yes          | 61 (40-102)         | Yes        | No             | NP           | -               | -          | -              | Yes    |
| 21      | MET-CF81  | F      | 67  | Endometrium   | IT               | Cerebellar hemisphere | 9          | No                         | 1.5                       | Yes          | 33 (29-44)          | Yes        | No             | Yes          | 131 (76-163)    | Yes        | Yes (B)        | Yes    |
| 22      | MET-CF82  | M      | 72  | Colon         | ST               | Temporal              | 1          | No                         | 6.1                       | Yes          | 62 (47-74)          | Yes        | No             | Yes          | 186 (72-199)    | Yes        | -              | Yes    |
| 23      | MET-CF83  | F      | 68  | Breast        | IT               | Vermis                | 1          | No                         | 11.7                      | No           | -                   | -          | -              | -            | -               | -          | -              | No     |
| 24      | MET-CF84  | F      | 54  | Breast        | IT               | Cerebellar hemisphere | 2          | No                         | 6.3                       | No           | -                   | Yes        | No             | -            | -               | -          | -              | No     |
| 25      | MET-CF85  | M      | 73  | Lung          | ST               | Frontal               | 2          | RS                         | 11.4                      | No           | -                   | Yes        | No             | -            | -               | -          | -              | No     |
| 26      | MET-CF87  | M      | 67  | Lung          | ST               | Temporal              | 1          | No                         | 11.3                      | Yes          | 45 (43-100)         | Yes        | No             | Yes          | 114 (10-144)    | Yes        | Yes (B)        | Yes    |
| 27      | MET-CF88  | M      | 55  | Prostate      | ST               | Frontal               | 2          | No                         | 4.9                       | Yes          | 92 (64-166)         | No         | No             | No           | -               | -          | -              | Yes    |
| 28      | MET-CF89  | M      | 81  | Colon         | IT               | Cerebellar hemisphere | 3          | No                         | 4.9                       | Yes          | 26 (22-34)          | No         | No             | Yes          | 83 (64-92)      | Yes        | Yes (B)        | Yes    |
| 29      | MET-CF90  | M      | 68  | Lung          | IT               | Vermis                | 1          | No                         | 1.1                       | Yes          | 78                  | Yes        | Yes (LM)       | NP           | -               | -          | -              | No     |
| 30      | MET-CF92  | M      | 73  | Lung          | ST               | Temporal              | 1          | No                         | 9.6                       | Yes          | 120                 | No         | No             | NP           | -               | -          | -              | No     |
| 31      | MET-CF93  | M      | 63  | Lung          | IT               | Cerebellar hemisphere | 1          | No                         | 6.2                       | No           | -                   | -          | -              | -            | -               | -          | -              | No     |
| 32      | MET-CF94  | M      | 47  | Lung          | ST               | Frontal               | 2          | RS                         | 6.1                       | No           | -                   | -          | -              | -            | -               | -          | -              | No     |
| 33      | MET-CF95  | M      | 65  | Lung          | ST               | Temporal              | 2          | No                         | 4.9                       | No           | -                   | -          | -              | -            | -               | -          | -              | No     |
| 34      | MET-CF96  | F      | 55  | Breast        | ST               | Parietal              | 3          | No                         | 3.4                       | Yes          | 65 (58-72)          | No         | No             | NP           | -               | -          | -              | No     |
| 35      | MET-CF97  | F      | 81  | Colon         | ST               | Temporal              | 2          | No                         | 3.0                       | Yes          | 75                  | No         | No             | NP           | -               | -          | -              | No     |

PDX: Patient-derived xenograft; PDC: Patient-derived culture; ST: Supratentorial; IT: Infratentorial; RT: Radiotherapy; RS: Radiosurgery; CNS: Central nervous system; B: Brain; LM: Leptomeninges; NP: Not performed. All values are presented as median with interquartile range. Related to Figure 1.

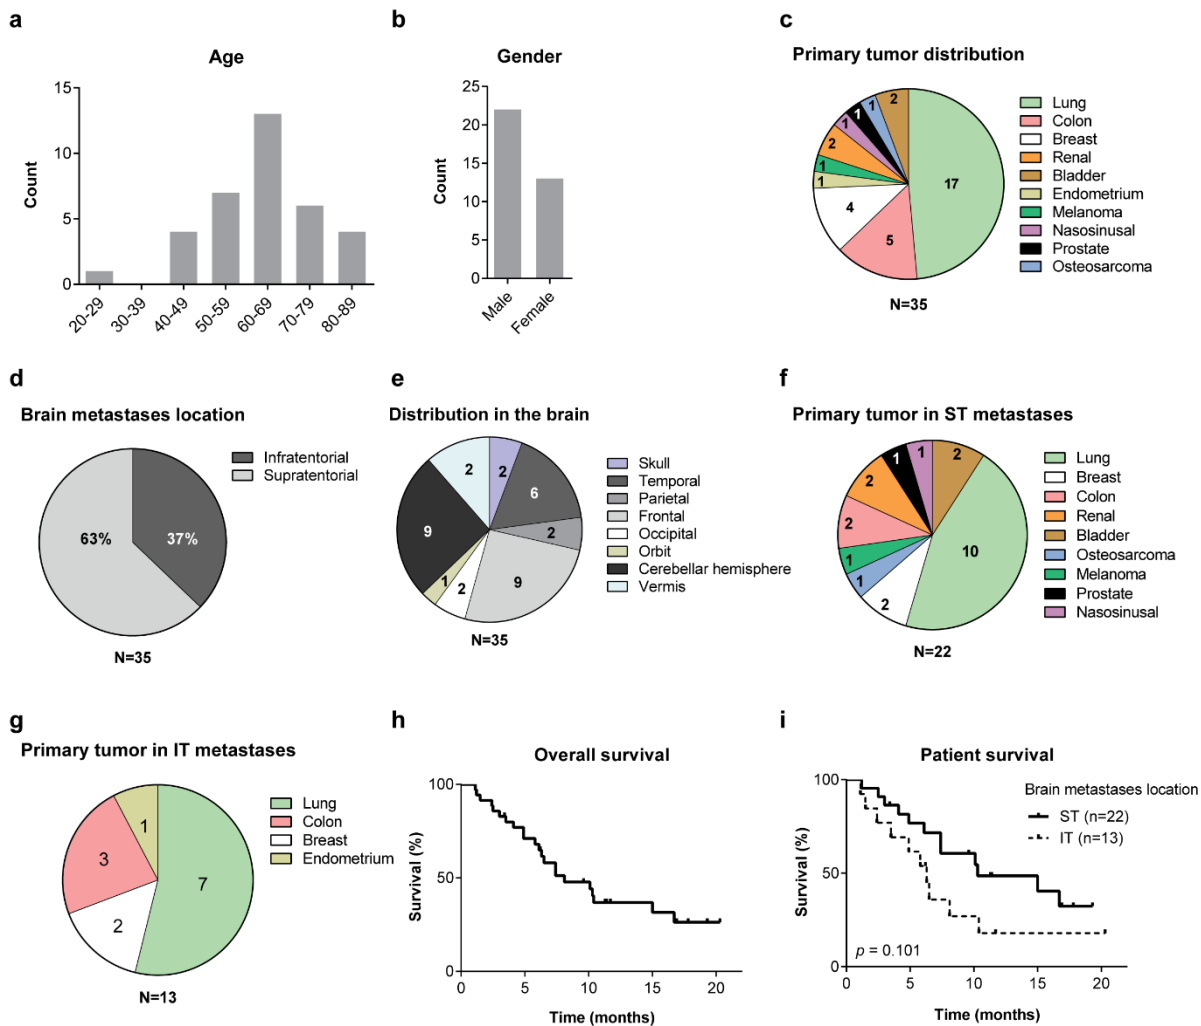

**Supplementary Figure 1.** Clinical characterization of the cohort of patients with BMs.

(A) Age of patients at the time of BMs surgery. (B) Gender distribution. (C) Distribution of patients according to the primary tumor. (D) Percentage of BMs in the supratentorial and infratentorial compartments. (E) Anatomical location of BMs. (F-G) Distribution of primary tumors according to the location in the intracranial compartments. (H) Overall survival of patients upon diagnosis of BMs. (I) Patient overall survival according to the metastases location in the intracranial compartments. ST: Supratentorial; IT: Infratentorial. Differences were considered statistically significant for  $p$ -values  $< 0.05$ , according to the Log-rank (Mantel-Cox) test. Related to Figure 1.

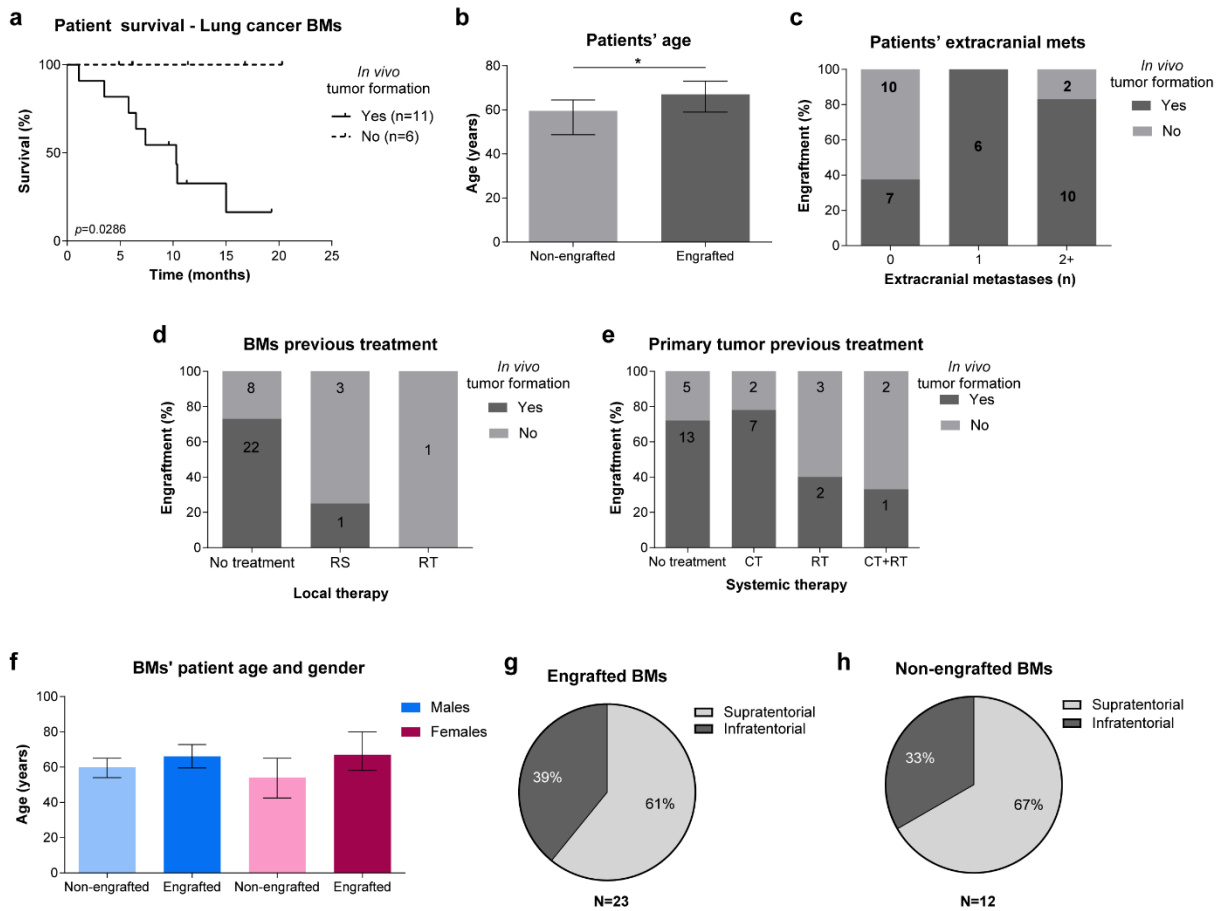

**Supplementary Figure 2.** Impact of clinical features on BMs engraftment.

(A) The *in vivo* tumorigenic potential of lung cancer BMs surgical samples correlates with patient poor survival ( $p=0.0286$ ). (B) Engrafted samples derived from significantly older patients ( $p=0.0228$ ). (C) Samples derived from patients displaying one or more extracranial metastases seem to have better engraftment ability. (D) BM local treatment seem to decrease engraft ability. (E) Treatment to the primary tumor with radiotherapy seems to decrease the ability of BMs to engraft in mice. (F) Comparison of patient median age for both engrafted vs non-engrafted samples by gender. (G and H) Distribution of BMs between supratentorial (ST) and infratentorial (IT) compartments for both engrafted and non-engrafted samples. Differences were considered statistically significant for  $p$ -values  $< 0.05$ , according to an unpaired non-parametric Mann-Whitney test and to the Log-rank (Mantel-Cox) test. Related to Figure 1.

**MET-CF38**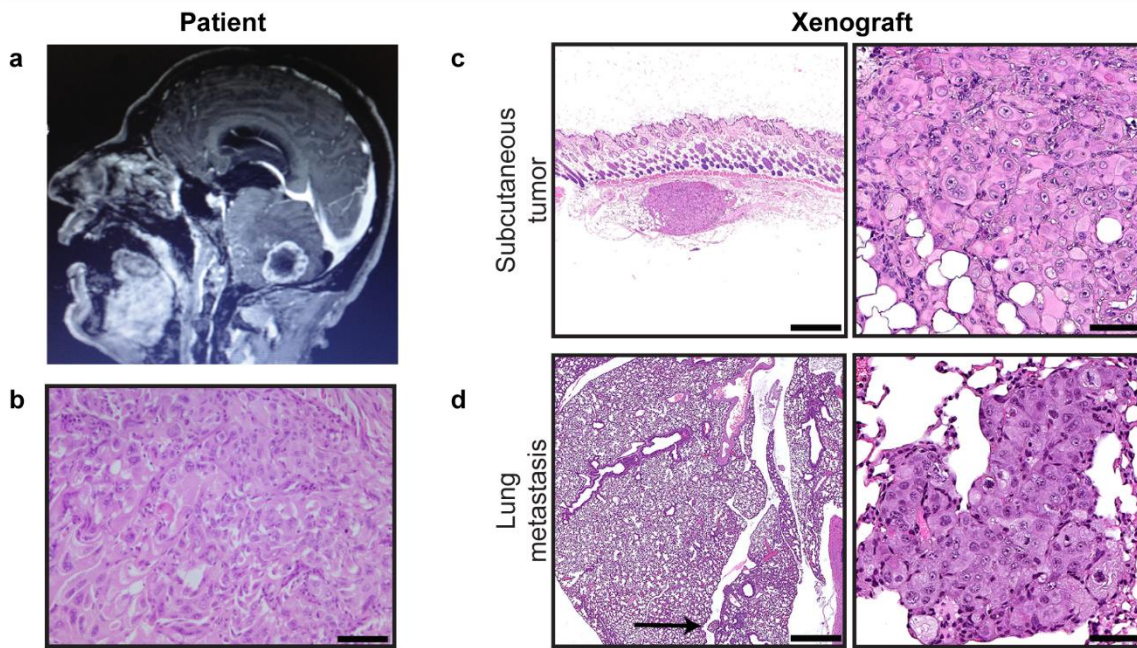**MET-CF69**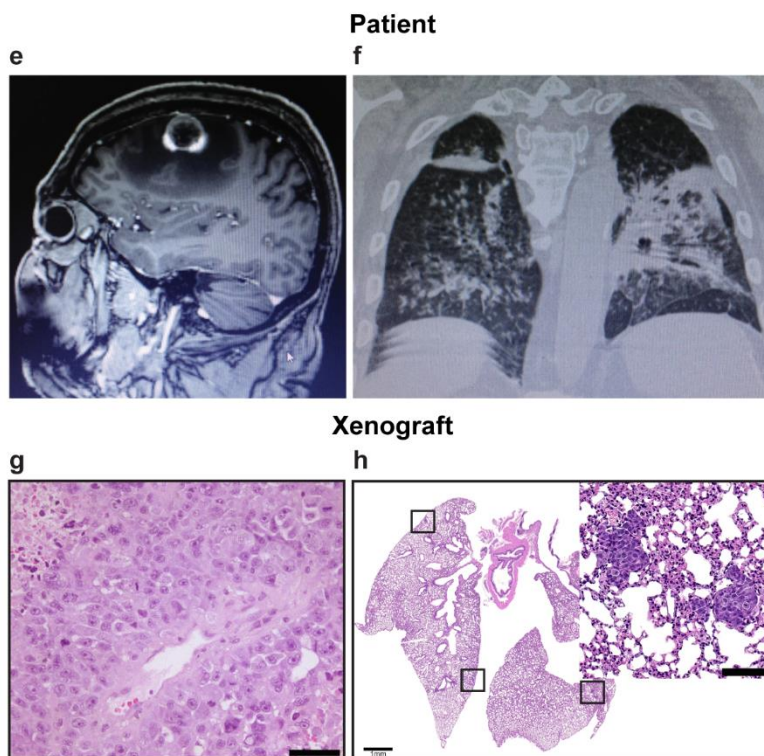**Supplementary Figure 3.** Comparison of clinical cases and their matched subcutaneous PDXs models.

Representative clinical case of a 49 years-old male patient with a stage IV lung adenocarcinoma where the BM (MET-CF38) xenografted in the mice flank originated spontaneous metastases in the lungs of the PDX. (A) Magnetic Resonance Imaging (MRI) of the brain, sagittal T1 contrast-enhanced sequence, showing a BM in the cerebellum. (B) H&E staining of the patient BM. (C) Corresponding H&E staining of the mouse flank xenograft. (D) Exclusive dissemination to the mouse lungs through passaging. Arrow indicates metastasis's location.

Representative clinical case of a 76 years-old male patient with metastatic melanoma to the brain (MET-CF69) and to the lungs, where the xenografted BM originated spontaneous metastases in the mice lungs. (E) Brain MRI, sagittal T1 contrast-enhanced, showing a left frontal BM. (F) Computed Tomography (CT) scan of the patient's lungs showing a diffuse infiltration by cancer cells. (G) H&E staining of the patient BM (20x). (H) H&E staining of the mice lungs exhibiting multiple metastases (squares). Scale bars: (B) 50µm, (C) 1mm and 50µm, (D) 1mm and 50µm, (G) 50µm, (H) 1mm. Related to Figure 2.

**Supplementary Table 2.** Matched patient and mice metastatic sites in subcutaneous PDX models.

| Primary tumor | Sample ID | Metastases location |        |        |        |        |             |             |              |        |                      |
|---------------|-----------|---------------------|--------|--------|--------|--------|-------------|-------------|--------------|--------|----------------------|
|               |           | CNS                 | Lungs  | Liver  | Spleen | Kidney | Intraperit. | Lymph nodes | Soft tissues | Gonads | Bone/<br>Bone marrow |
| Lung          | MET-CF38  | Red                 | Green  |        |        |        |             |             |              |        |                      |
|               | MET-CF58  | Red                 | Green  | Red    | Red    |        |             |             |              |        |                      |
|               | MET-CF66  | Yellow              | Green  | Green  | Green  | Green  |             | Yellow      |              |        | Green                |
|               | MET-CF68  | Red                 | Green  |        |        | Green  | Green       | Yellow      |              |        |                      |
|               | MET-CF78  | Yellow              | Green  | Yellow | Green  | Green  | Yellow      | Yellow      | Green        | Green  |                      |
|               | MET-CF80  | Red                 |        | Green  |        | Green  |             |             | Yellow       |        |                      |
|               | MET-CF85  | Red                 | Green  | Green  | Green  | Green  |             |             |              |        |                      |
|               | MET-CF87  | Red                 |        |        |        |        |             |             | Green        |        |                      |
|               | MET-CF90  | Yellow              | Green  | Green  | Green  | Green  |             |             |              |        |                      |
| Melanoma      | MET-CF69  | Red                 | Yellow | Red    |        | Green  |             |             | Green        |        |                      |
| Colon         | MET-CF70  | Red                 | Red    |        |        |        |             |             | Green        |        |                      |
|               | MET-CF82  | Red                 | Red    | Red    |        |        |             | Red         | Green        |        |                      |
| Endometrium   | MET-CF81  | Red                 | Yellow |        |        |        | Green       |             |              |        |                      |
| Breast        | MET-CF84  | Red                 | Green  |        |        |        |             |             |              |        |                      |

Red - organs with tumor involvement in the patient; Green - organs with tumor involvement in the mouse; Yellow - organs with tumor involvement in both patient and mouse. Related to Figure 2.

## MET-CF66

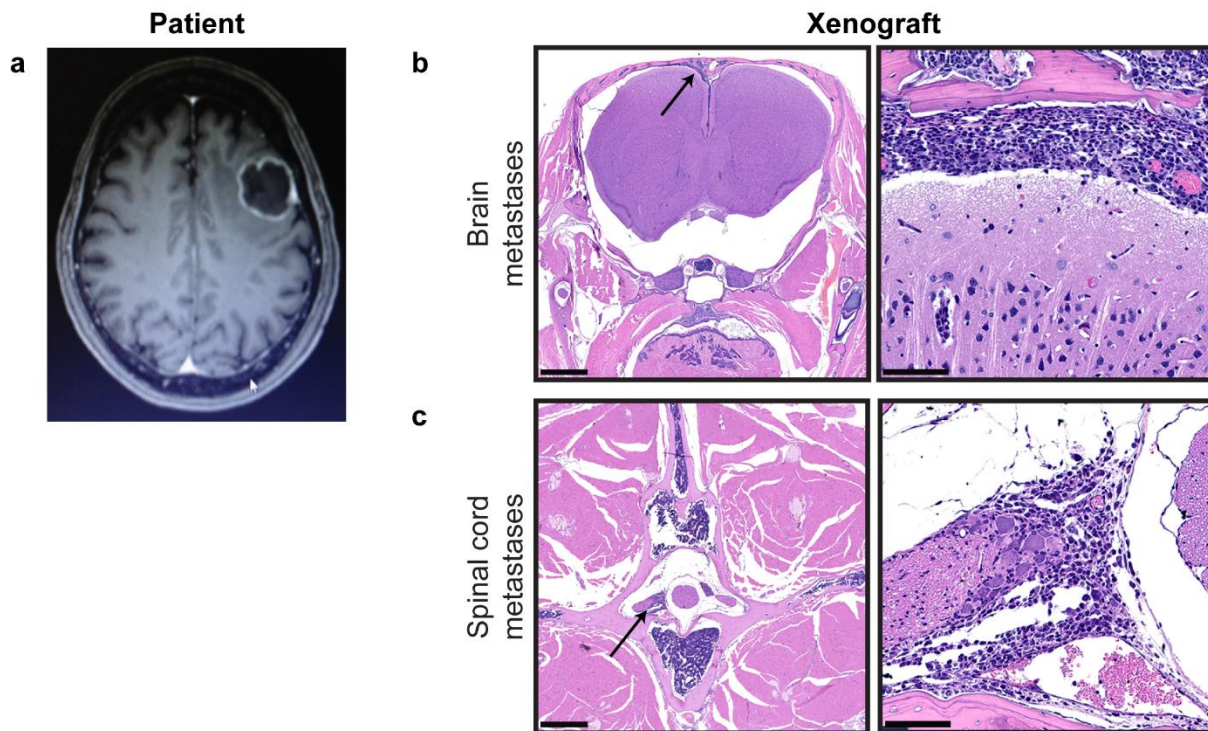

## MET-CF90

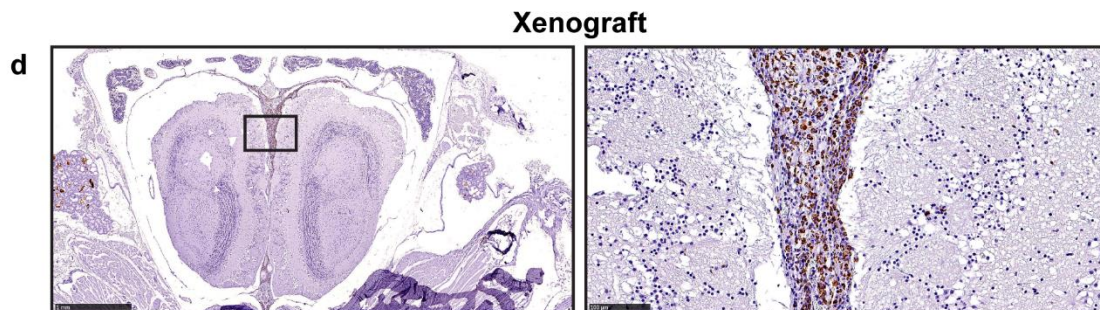

**Supplementary Figure 4.** Spontaneous CNS leptomenigeal dissemination in flank implanted BMs from lung cancer.

(A) Brain MRI, axial T1 contrast-enhanced sequence, of a 66 years-old female patient with a left frontal BM from lung adenocarcinoma (MET-CF66). (B-C) H&E staining showing spontaneous leptomenigeal dissemination to the brain and the spinal cord in the matched mouse xenograft. Arrow indicates metastasis's location. (D) Representative anti-human mitochondria staining of a mouse brain with leptomenigeal dissemination derived from a 68 years-old patient with a posterior fossa BM from lung adenocarcinoma (MET-CF90). Scale bars: (B) 1mm and 100 $\mu$ m, (C) 1mm and 100 $\mu$ m, (D) 1mm and 100 $\mu$ m. Related to Figure 2.



**Supplementary Table 3.** Matched patient and mice metastatic sites in intracardiac PDX models.

| Primary tumor | Sample ID | Metastases location |        |       |        |            |             |        |        |        |           |              |                  |         |
|---------------|-----------|---------------------|--------|-------|--------|------------|-------------|--------|--------|--------|-----------|--------------|------------------|---------|
|               |           | CNS                 | Lungs  | Liver | Kidney | Suprarenal | Intraperit. | Spleen | Gonads | Orbita | Mandibula | Soft tissues | Bone/Bone marrow | Subcut. |
| Lung          | MET-CF30  | Red                 |        | Green |        | Red        | Red         |        |        |        |           |              |                  |         |
|               | MET-CF66  | Red                 |        |       |        |            | Green       | Green  |        |        |           |              |                  |         |
|               | MET-CF68  | Red                 | Green  | Green | Green  | Green      |             |        |        |        |           | Green        | Green            |         |
|               | MET-CF78  | Red                 | Green  | Red   | Green  |            | Yellow      |        |        |        |           | Green        |                  | Green   |
|               | MET-CF79  | Red                 |        |       |        |            |             |        |        |        |           |              |                  | Green   |
|               | MET-CF87  | Yellow              |        | Green |        |            |             |        |        |        |           |              |                  | Green   |
| Osteosarcoma  | MET-CF65  | Red                 | Yellow | Green | Green  | Green      |             |        |        |        |           |              |                  |         |
| Melanoma      | MET-CF69  | Yellow              | Yellow | Green | Green  | Green      | Green       |        |        | Green  |           | Green        | Green            |         |
| Colon         | MET-CF70  | Yellow              | Yellow | Green | Green  | Green      | Green       |        | Green  |        | Green     | Green        | Green            |         |
|               | MET-CF82  | Red                 | Red    | Red   |        | Green      |             |        |        |        |           |              | Green            |         |
|               | MET-CF89  | Yellow              | Red    |       | Green  | Yellow     |             |        | Green  |        |           |              | Green            |         |
| Bladder       | MET-CF29  | Yellow              |        |       |        |            |             |        |        |        |           |              |                  |         |
| Endometrium   | MET-CF81  | Yellow              | Yellow | Green | Green  | Red        | Green       |        | Green  |        |           | Green        | Green            |         |

Red - organs with tumor involvement in the patient; Green - organs with tumor involvement in the mouse; Yellow - organs with tumor involvement in both patient and mouse. Related to Figure 4.

## MET-CF89

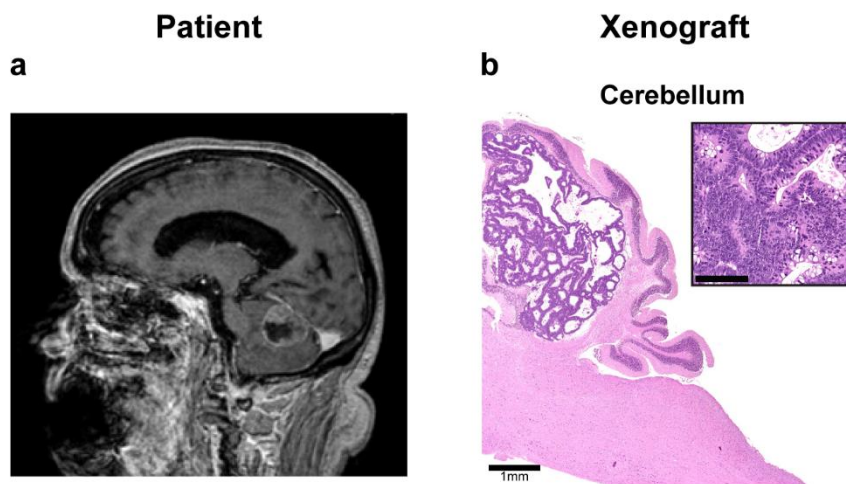

## MET-CF81

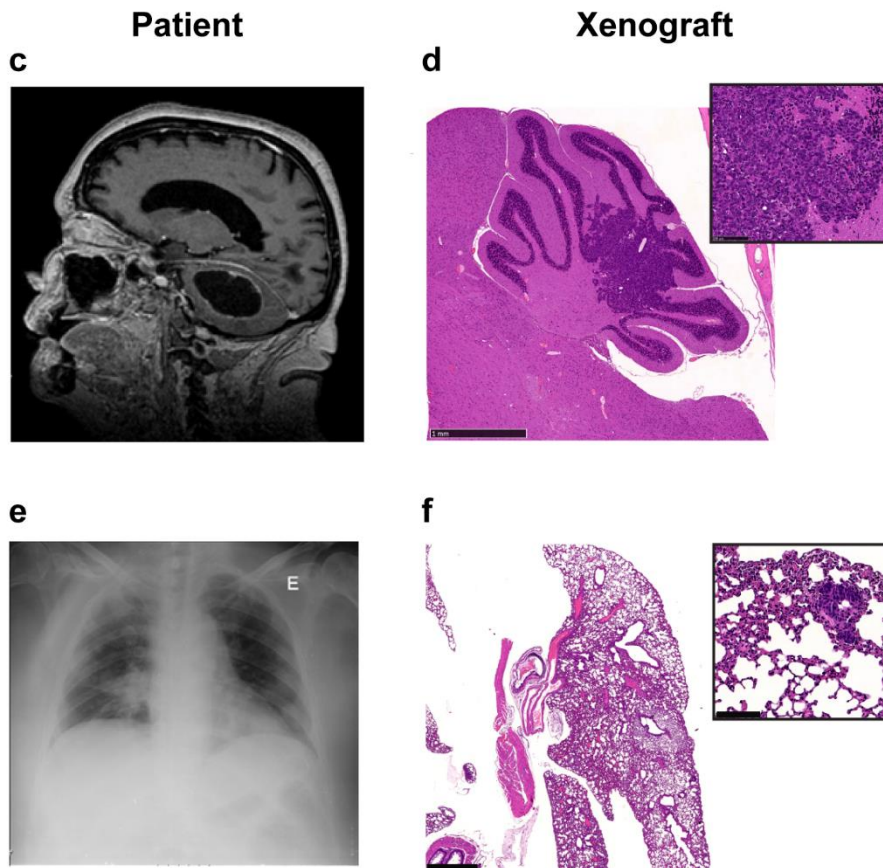

**Supplementary Figure 5.** Comparison of clinical cases and their matched intracardiac PDXs models. Intracardiac xenograft of a surgically resected cerebellar BM (MET-CF89) from a patient with colon cancer mirrored the intracranial location of the patient's tumor. (A) Brain MRI, sagittal T1 contrast-enhanced sequence, of an 81 years-old male patient with a BM in the cerebellum from a colon carcinoma. (B) Corresponding H&E staining of a metastasis in the mouse cerebellum. Representative clinical case of a 67 years-old female patient with metastatic endometrium cancer derived BM (MET-CF81), where the intracardiac xenograft shared two metastatic sites with the donor. (C) Brain MRI, sagittal T1 contrast-enhanced sequence, showing a cystic BM in the cerebellum and (D) the correspondent H&E staining of the mouse metastasis in the cerebellum. (E) Right lung metastases in the patients' chest X Ray and (F) the matched lung metastases in the xenograft. Scale bars: (B) 1mm and 100 $\mu$ m, (D) 1mm and 100 $\mu$ m, (F) 1mm and 100 $\mu$ m. Related to Figure 4.

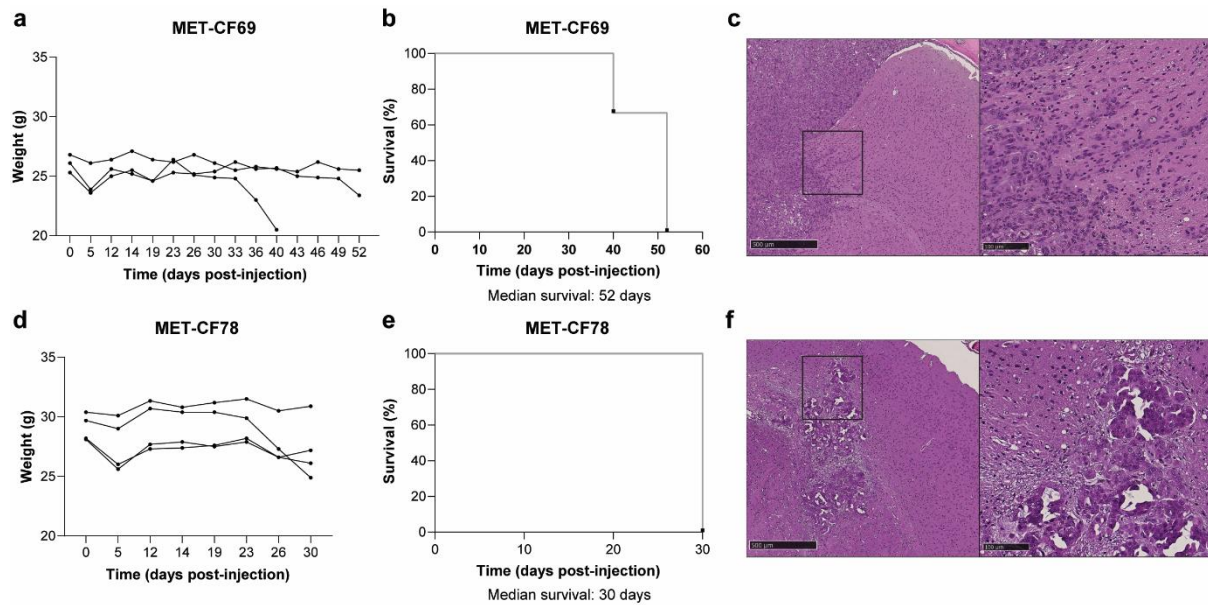

**g**

| PDC                      | Primary tumor | Histological evaluation |                     |                                     |                                    |                                  |
|--------------------------|---------------|-------------------------|---------------------|-------------------------------------|------------------------------------|----------------------------------|
|                          |               | Brain invasion          | Brain dissemination | Brain stem/cerebellum dissemination | Spinal cord thoracic dissemination | Spinal cord lumbar dissemination |
| <b>MET-CF69</b><br>(N=3) | Melanoma      | 3/3 (3/3 HI)            | 0/3                 | 0/3                                 | 0/3                                | 0/3                              |
| <b>MET-CF78</b><br>(N=4) | Lung          | 4/4 (2/4 HI)            | 3/4                 | 2/4                                 | 2/4                                | 2/4                              |

**Supplementary Figure 6.** *In vivo* models of orthotopic implanted BMs.

PDCs were established from subcutaneous xenografts of BM samples derived from patients with (A-C) a melanoma and (D-F) a lung carcinoma. The growth pattern of these PDCs in the brain was assessed after intracranial injection of cells in mice. (A and D) Body weight variation throughout time, (B and E) survival curves and (C and F) H&E sections of brain tumors are shown for each PDC in 5x (left) and 20x (right) amplifications. (G) Histological evaluation of H&E sections of mice CNS was performed to evaluate the pattern of brain invasion and dissemination, as well as the dissemination along the spinal cord. Scale bars: (C) 500µm and 100µm, (F) 500µm and 100µm. Related to Figure 6.

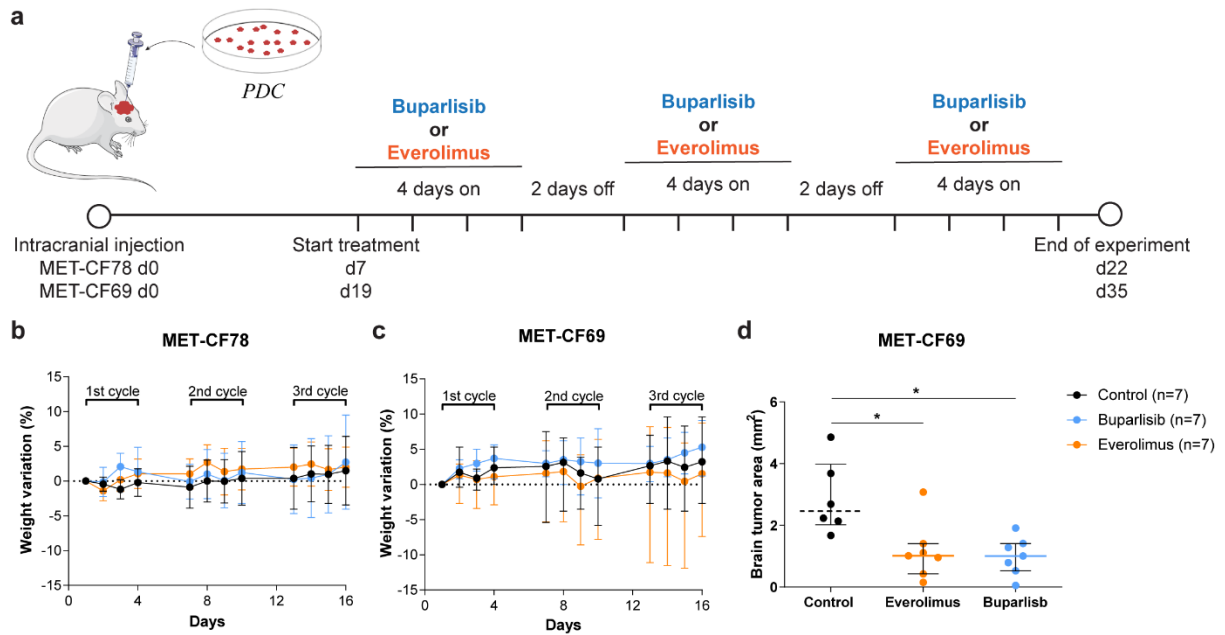

**Supplementary Figure 7.** Patient-derived xenografts were established by the intracranial injection of PDCs to assess the efficacy of buparlisib and everolimus *in vivo*.

(A) Representative scheme of the treatment evaluation performed in xenografts established by the intracranial injection of PDCs derived from BM samples of a lung (MET-CF78) and a melanoma (MET-CF69) cancer patients. Animals were randomly divided in 3 groups: buparlisib (30mg/kg/day; n=7), everolimus (3mg/kg/day; n=7), and vehicle (5% DMSO/30% PEG300/H<sub>2</sub>O; n=7) used as a negative control for comparison. Treatment administration was performed in 3 cycles of therapy with buparlisib and everolimus. Body weight variation was assessed throughout time for (B) MET-CF78 and for (C) MET-CF69. (D) Histological sections of the CNS were evaluated to assess the tumor area in the brain. Data is represented as median with interquartile range. Differences were considered statistically significant for p-values < 0.05, according to the Mann-Whitney test. Related to Figure 6.
